# Supplementary material for: Maternal characteristics and obstetrical complications impact neonatal outcomes in Indonesia: a prospective study
Source: Springer Nature journal article supplement (doi:10.1186/s12884-017-1280-1), 2017-03-28
Supplement: MOESM1 [file 12183010]

## QUality and Access to PErinatal hospital Care at the district level (QUAPEC)

### INFORMED CONSENT – MATERNAL

For obstetric patient or her family who is most knowledgeable about the patient's condition and characteristics

- |                            |                                           |
|----------------------------|-------------------------------------------|
| 1. Study number            | <input style="width: 100%;" type="text"/> |
| 2. Name of the woman _____ | <input style="width: 100%;" type="text"/> |
| 3. Case note number        | <input style="width: 100%;" type="text"/> |

#### RESPONDENT INFORMED CONSENT:

SEEK RESPONDENT'S AGREEMENT TO PARTICIPATE BY READING THE STATEMENT BELOW.

*My name is \_\_\_\_\_. I am from the University of Indonesia. Under official permission from the hospital, we are conducting a study to explore information from the patients, mainly about referral and patient's characteristics. The purpose of this activity is mainly to find out any difficulties faced by patients in obtaining health care. I would like to interview you about (the condition of [full name of the patient] or about your condition –depends on whether respondent is the patient her self or other family member) \_\_\_\_\_. The information you give us will be treated in the strictest confidence. Participation in this interview is entirely voluntary. You are free not to take part at all or to stop the interview at any time and there will be no implication on the quality and cost of care provided to you by this hospital. However, your answers are very important to us and will help to improve the delivery of health services and access in the utilization of health services, especially for mothers and babies in Indonesia. The interview will last approximately 30 minutes. Are you willing to be interviewed? ..... If Yes, would you please sign this form to indicate your consent.*

Full name of respondent \_\_\_\_\_ Signature \_\_\_\_\_

1. Agree to be interviewed
2. Do not agree

(circle one of the above accordingly)

*Do you have any questions about the interview or may I begin the interview?*  
 If the informant is not willing to be interviewed, thank him/her and end the interview.

|                                       |                                                                     |                                                                    |                                                 |                |                |
|---------------------------------------|---------------------------------------------------------------------|--------------------------------------------------------------------|-------------------------------------------------|----------------|----------------|
| Hospital Code                         | 1. Malang Hospital; 2. Pasuruan Hospital                            |                                                                    | <input type="checkbox"/>                        |                |                |
| Date of admission                     | DD/MM/YYYY                                                          | <input type="text"/> / <input type="text"/> / <input type="text"/> |                                                 |                |                |
| Time of interview                     | HH:MM                                                               | Start <input type="text"/> : <input type="text"/>                  | End <input type="text"/> : <input type="text"/> |                |                |
| Result of interview                   | 1. Completed                                                        | <input type="checkbox"/>                                           |                                                 |                |                |
|                                       | 2. Incomplete, reason .....<br>(e.g: patient stopped the interview) | <input type="text"/>                                               |                                                 |                |                |
|                                       | 3. Not done, reason.....<br>(e.g.: patient refused, discharged)     |                                                                    |                                                 |                |                |
| <b>Information on form management</b> |                                                                     |                                                                    |                                                 |                |                |
|                                       | Filling in form                                                     | Check 1<br>(data collector)                                        | Check 2<br>(field supervisor)                   | Entry 1        | Entry 2        |
| Name                                  |                                                                     |                                                                    |                                                 |                |                |
| Code                                  |                                                                     |                                                                    |                                                 |                |                |
| Date                                  | __ / __ / ____                                                      | __ / __ / ____                                                     | __ / __ / ____                                  | __ / __ / ____ | __ / __ / ____ |
| Signature                             |                                                                     |                                                                    |                                                 |                |                |

**QMP5. Form in INPATIENT/FAMILY INTERVIEW  
For ALL Obstetric Admission**

| No.                                                                                                  | Questions                                                                                   | Response Categories                                                                                                                                            | Code                     |
|------------------------------------------------------------------------------------------------------|---------------------------------------------------------------------------------------------|----------------------------------------------------------------------------------------------------------------------------------------------------------------|--------------------------|
| <b>I. RESPONDENT'S IDENTITY</b>                                                                      |                                                                                             |                                                                                                                                                                |                          |
| 1.1                                                                                                  | Name of respondent                                                                          |                                                                                                                                                                |                          |
| 1.2                                                                                                  | Sex of respondent                                                                           | 1. Male                      2. Female                                                                                                                         | <input type="checkbox"/> |
| 1.3                                                                                                  | Relationship of informant to the patient                                                    | 1. Husband<br>2. Parent<br>3. Parent in law<br>4. Sibling<br>5. Sibling in law<br>6. Other relative<br>7. Respondent is the patient<br>8. Other, specify ..... | <input type="checkbox"/> |
| <b>II. CHARACTERISTICS OF THE WOMAN AND HER FAMILY</b>                                               |                                                                                             |                                                                                                                                                                |                          |
| 2.1                                                                                                  | Name of the patient                                                                         |                                                                                                                                                                |                          |
| 2.2                                                                                                  | Age of the patient [NAME]                                                                   | _____ years                                                                                                                                                    | <input type="text"/>     |
| 2.3                                                                                                  | Occupation of the patient                                                                   |                                                                                                                                                                |                          |
| 2.4                                                                                                  | What is the highest level of school [NAME] attended?                                        | 0=No schooling<br>1=primary<br>2=junior high<br>3=senior high<br>4=academy<br>5=university<br>6=other, specify _____                                           | <input type="checkbox"/> |
| 2.5                                                                                                  | What is the highest (grade/year) [NAME] completed at that level?                            | Year/grade .....                      88=Don't know                                                                                                            | <input type="text"/>     |
| 2.6                                                                                                  | Name of husband                                                                             |                                                                                                                                                                |                          |
| 2.7                                                                                                  | Age of husband                                                                              | _____ years                      88=Don't know                                                                                                                 | <input type="text"/>     |
| 2.8                                                                                                  | Husband's occupation                                                                        |                                                                                                                                                                |                          |
| 2.9                                                                                                  | What is the highest level of school that the husband attended?                              | 0=No schooling<br>1=primary<br>2=junior high<br>3=senior high<br>4=academy<br>5=university<br>6=other, specify _____<br>8=don't know                           | <input type="checkbox"/> |
| 2.10                                                                                                 | What is the highest (grade/year) that the husband completed at that level?                  | Year/grade .....                      88=Don't know                                                                                                            | <input type="text"/>     |
| 2.11                                                                                                 | Does anyone else in your household have higher level of education than you or your husband? | 1=Yes                      0=No                      8=Don't know                                                                                              | <input type="text"/>     |
| If Q2.11 is YES, ask Q2.12 and 2.13 for member of household referred in Q2.11. If NO, skip to Q2.14. |                                                                                             |                                                                                                                                                                |                          |









Were any of these problems below present?

| V. PROBLEMS FOUND |                                                                                                               |                                                                                  |                          |             |
|-------------------|---------------------------------------------------------------------------------------------------------------|----------------------------------------------------------------------------------|--------------------------|-------------|
|                   | System                                                                                                        | Example                                                                          | Code                     | Description |
| 5.1               | Personal/Family/<br>Community                                                                                 | Delay in mother seeking help/care<br>1=Yes 2=No 8=Unknown                        | <input type="checkbox"/> |             |
| 5.2               |                                                                                                               | Refusal of treatment or admission<br>1=Yes 2=No 8=Unknown                        | <input type="checkbox"/> |             |
| 5.3               | Logistical systems:<br>Transportation,<br>Communication,<br>Access (Distance,<br>Culture, Socio-<br>economy)) | Lack of transportation from home to<br>health facility<br>1=Yes 2=No 8=Unknown   | <input type="checkbox"/> |             |
| 5.4               |                                                                                                               | Lack of transportation between health<br>care facilities<br>1=Yes 2=No 8=Unknown | <input type="checkbox"/> |             |
| 5.5               |                                                                                                               | Geographical problem to reach health<br>care facility<br>1=Yes 2=No 8=Unknown    | <input type="checkbox"/> |             |
| 5.6               |                                                                                                               | Lack of fund for referral and delivery<br>care<br>1=Yes 2=No 8=Unknown           | <input type="checkbox"/> |             |
| 5.7               | Administration                                                                                                | Lack of access to Letter of Poverty<br>Proof (SKTM)<br>1=Yes 2=No 8=Unknown      | <input type="checkbox"/> |             |
| 5.8               | Is there any P4K<br>sticker stuck on the<br>wall/door                                                         | 1=Yes 2=No 8=Unknown                                                             | <input type="checkbox"/> |             |

| No.                                   | Questions                                                          | Response Categories                                                                                                                                                                                                                                                                                                                                                                                                                              | Code                                                                                                                                         |     |                 |     |     |                 |  |  |  |  |  |  |  |  |  |  |  |  |  |  |  |  |  |  |  |
|---------------------------------------|--------------------------------------------------------------------|--------------------------------------------------------------------------------------------------------------------------------------------------------------------------------------------------------------------------------------------------------------------------------------------------------------------------------------------------------------------------------------------------------------------------------------------------|----------------------------------------------------------------------------------------------------------------------------------------------|-----|-----------------|-----|-----|-----------------|--|--|--|--|--|--|--|--|--|--|--|--|--|--|--|--|--|--|--|
| <b>VI. PREVIOUS OBSTETRIC HISTORY</b> |                                                                    |                                                                                                                                                                                                                                                                                                                                                                                                                                                  |                                                                                                                                              |     |                 |     |     |                 |  |  |  |  |  |  |  |  |  |  |  |  |  |  |  |  |  |  |  |
| 6.1                                   | Age at first pregnancy of the<br>patient                           | _____ year                                                                                                                                                                                                                                                                                                                                                                                                                                       | <input type="text"/> <input type="text"/>                                                                                                    |     |                 |     |     |                 |  |  |  |  |  |  |  |  |  |  |  |  |  |  |  |  |  |  |  |
| 6.2                                   | Number of previous births of the<br>patient                        | 1. Live-birth: _____<br>2. Still-birth: _____<br>3. Abortion, including ectopic<br>pregnancy, Hydatidiform<br>mole: _____<br>99. Unknown /No information                                                                                                                                                                                                                                                                                         | 1. <input type="text"/> <input type="text"/><br>2. <input type="text"/> <input type="text"/><br>3. <input type="text"/> <input type="text"/> |     |                 |     |     |                 |  |  |  |  |  |  |  |  |  |  |  |  |  |  |  |  |  |  |  |
| 6.3                                   | Had any of the patient's child died                                | 1. Yes            2. No<br>9. Unknown /No information                                                                                                                                                                                                                                                                                                                                                                                            | <input type="checkbox"/>                                                                                                                     |     |                 |     |     |                 |  |  |  |  |  |  |  |  |  |  |  |  |  |  |  |  |  |  |  |
| 6.4                                   | If Q6.3 is YES, please list age of<br>death of the patient's child | <table border="1" style="width: 100%; border-collapse: collapse;"> <thead> <tr> <th>No.</th> <th>Age</th> <th>Year/month/days</th> <th>No.</th> <th>Age</th> <th>Year/month/days</th> </tr> </thead> <tbody> <tr><td> </td><td> </td><td> </td><td> </td><td> </td><td> </td></tr> <tr><td> </td><td> </td><td> </td><td> </td><td> </td><td> </td></tr> <tr><td> </td><td> </td><td> </td><td> </td><td> </td><td> </td></tr> </tbody> </table> | No.                                                                                                                                          | Age | Year/month/days | No. | Age | Year/month/days |  |  |  |  |  |  |  |  |  |  |  |  |  |  |  |  |  |  |  |
| No.                                   | Age                                                                | Year/month/days                                                                                                                                                                                                                                                                                                                                                                                                                                  | No.                                                                                                                                          | Age | Year/month/days |     |     |                 |  |  |  |  |  |  |  |  |  |  |  |  |  |  |  |  |  |  |  |
|                                       |                                                                    |                                                                                                                                                                                                                                                                                                                                                                                                                                                  |                                                                                                                                              |     |                 |     |     |                 |  |  |  |  |  |  |  |  |  |  |  |  |  |  |  |  |  |  |  |
|                                       |                                                                    |                                                                                                                                                                                                                                                                                                                                                                                                                                                  |                                                                                                                                              |     |                 |     |     |                 |  |  |  |  |  |  |  |  |  |  |  |  |  |  |  |  |  |  |  |
|                                       |                                                                    |                                                                                                                                                                                                                                                                                                                                                                                                                                                  |                                                                                                                                              |     |                 |     |     |                 |  |  |  |  |  |  |  |  |  |  |  |  |  |  |  |  |  |  |  |
| 6.5                                   | Number of current living children                                  |                                                                                                                                                                                                                                                                                                                                                                                                                                                  | <input type="text"/> <input type="text"/>                                                                                                    |     |                 |     |     |                 |  |  |  |  |  |  |  |  |  |  |  |  |  |  |  |  |  |  |  |
| 6.6                                   | Number of children born premature                                  | 1. Yes, spcify .....<br>2. No<br>8. Unknown /No information                                                                                                                                                                                                                                                                                                                                                                                      | <input type="checkbox"/><br><input type="text"/> <input type="text"/>                                                                        |     |                 |     |     |                 |  |  |  |  |  |  |  |  |  |  |  |  |  |  |  |  |  |  |  |
| 6.7                                   | Number of children born less than<br>2500 gram                     | 1. Yes, specify .....<br>2. No<br>8. Unknown /No information                                                                                                                                                                                                                                                                                                                                                                                     | <input type="checkbox"/><br><input type="text"/> <input type="text"/>                                                                        |     |                 |     |     |                 |  |  |  |  |  |  |  |  |  |  |  |  |  |  |  |  |  |  |  |
| 6.8                                   | Interval between previous and<br>index pregnancy                   | _____ months<br>888. Unknown/No information                                                                                                                                                                                                                                                                                                                                                                                                      | <input type="text"/> <input type="text"/>                                                                                                    |     |                 |     |     |                 |  |  |  |  |  |  |  |  |  |  |  |  |  |  |  |  |  |  |  |
| 6.9                                   | Where did the patient deliver her<br>previous pregnancy?           | 1. Home<br>2. Midwife's home<br>3. Health centre                                                                                                                                                                                                                                                                                                                                                                                                 | <input type="checkbox"/>                                                                                                                     |     |                 |     |     |                 |  |  |  |  |  |  |  |  |  |  |  |  |  |  |  |  |  |  |  |





|     |                                                      |                                                                                                                               |                                                                                                                                                                                                                  |
|-----|------------------------------------------------------|-------------------------------------------------------------------------------------------------------------------------------|------------------------------------------------------------------------------------------------------------------------------------------------------------------------------------------------------------------|
| 7.3 | Antenatal care provider                              | 1. Obstetrician<br>2. General practitioner<br>3. Midwife<br>4. Nurse<br>8. NA                                                 | <input type="checkbox"/><br><input type="checkbox"/><br><input type="checkbox"/><br><input type="checkbox"/>                                                                                                     |
| 7.4 | Number of ANC visits                                 | 1. Trimester I _____ visits<br>2. Trimester II _____ visits<br>3. Trimester III _____ visits<br>Total: _____ visits<br>88. NA | <input type="checkbox"/> <input type="checkbox"/><br><input type="checkbox"/> <input type="checkbox"/><br><input type="checkbox"/> <input type="checkbox"/><br><input type="checkbox"/> <input type="checkbox"/> |
| 7.5 | When did the mother had her first antenatal care     | ..... week of pregnancy                                                                                                       |                                                                                                                                                                                                                  |
| 7.6 | Did the mother see a TBA during your last pregnancy? | 1. Yes, specify service received: _____<br>0. No                                                                              | <input type="checkbox"/><br><hr/>                                                                                                                                                                                |

| No.                                                                                                                                       | Questions                                                                                | Response Categories                                                                                                                                                                                   | Code                                                                                                                                                                                                                                                                                                                                                                                                                                                                                                                                                                                                         |  |   |   |  |  |   |  |   |  |  |   |  |   |   |  |  |  |   |   |  |  |   |   |  |  |  |  |   |  |  |
|-------------------------------------------------------------------------------------------------------------------------------------------|------------------------------------------------------------------------------------------|-------------------------------------------------------------------------------------------------------------------------------------------------------------------------------------------------------|--------------------------------------------------------------------------------------------------------------------------------------------------------------------------------------------------------------------------------------------------------------------------------------------------------------------------------------------------------------------------------------------------------------------------------------------------------------------------------------------------------------------------------------------------------------------------------------------------------------|--|---|---|--|--|---|--|---|--|--|---|--|---|---|--|--|--|---|---|--|--|---|---|--|--|--|--|---|--|--|
| <b>VIII. DELIVERY HISTORY</b>                                                                                                             |                                                                                          |                                                                                                                                                                                                       |                                                                                                                                                                                                                                                                                                                                                                                                                                                                                                                                                                                                              |  |   |   |  |  |   |  |   |  |  |   |  |   |   |  |  |  |   |   |  |  |   |   |  |  |  |  |   |  |  |
| 8.1                                                                                                                                       | Did the mother come for post abortion care?                                              | 1. Yes 2. No 7. NA 9. Unknown                                                                                                                                                                         | <input type="checkbox"/>                                                                                                                                                                                                                                                                                                                                                                                                                                                                                                                                                                                     |  |   |   |  |  |   |  |   |  |  |   |  |   |   |  |  |  |   |   |  |  |   |   |  |  |  |  |   |  |  |
| Fill in 8.2 – 8.12 with NA for condition: abortion, ectopic pregnancy, mola, hiperemesis gravidarum, and other condition when no delivery |                                                                                          |                                                                                                                                                                                                       |                                                                                                                                                                                                                                                                                                                                                                                                                                                                                                                                                                                                              |  |   |   |  |  |   |  |   |  |  |   |  |   |   |  |  |  |   |   |  |  |   |   |  |  |  |  |   |  |  |
| 8.2                                                                                                                                       | Date of delivery                                                                         | ___/___/___ dd/mm/yy<br>___/___/___ dd/mm/yy<br>___/___/___ dd/mm/yy<br>77/77/77=NA                                                                                                                   | Fill in the boxes for each baby<br><table border="1" style="display: inline-table;"><tr><td> </td><td> </td><td>/</td><td> </td><td> </td><td>/</td><td> </td><td> </td></tr><tr><td> </td><td> </td><td>/</td><td> </td><td> </td><td>/</td><td> </td><td> </td></tr><tr><td> </td><td> </td><td>/</td><td> </td><td> </td><td>/</td><td> </td><td> </td></tr></table>                                                                                                                                                                                                                                      |  |   | / |  |  | / |  |   |  |  | / |  |   | / |  |  |  |   | / |  |  | / |   |  |  |  |  |   |  |  |
|                                                                                                                                           |                                                                                          | /                                                                                                                                                                                                     |                                                                                                                                                                                                                                                                                                                                                                                                                                                                                                                                                                                                              |  | / |   |  |  |   |  |   |  |  |   |  |   |   |  |  |  |   |   |  |  |   |   |  |  |  |  |   |  |  |
|                                                                                                                                           |                                                                                          | /                                                                                                                                                                                                     |                                                                                                                                                                                                                                                                                                                                                                                                                                                                                                                                                                                                              |  | / |   |  |  |   |  |   |  |  |   |  |   |   |  |  |  |   |   |  |  |   |   |  |  |  |  |   |  |  |
|                                                                                                                                           |                                                                                          | /                                                                                                                                                                                                     |                                                                                                                                                                                                                                                                                                                                                                                                                                                                                                                                                                                                              |  | / |   |  |  |   |  |   |  |  |   |  |   |   |  |  |  |   |   |  |  |   |   |  |  |  |  |   |  |  |
| 8.3                                                                                                                                       | Time of delivery                                                                         | ___: ___ hour/mnt<br>77. NA<br>88. Unknown/No information                                                                                                                                             | Fill in the boxes for each baby<br>Baby1 <table border="1" style="display: inline-table;"><tr><td> </td><td> </td><td>-</td><td> </td><td> </td></tr><tr><td> </td><td> </td><td>-</td><td> </td><td> </td></tr></table><br>Baby 2 <table border="1" style="display: inline-table;"><tr><td> </td><td> </td><td>-</td><td> </td><td> </td></tr><tr><td> </td><td> </td><td>-</td><td> </td><td> </td></tr></table><br>Baby 3 <table border="1" style="display: inline-table;"><tr><td> </td><td> </td><td>-</td><td> </td><td> </td></tr><tr><td> </td><td> </td><td>-</td><td> </td><td> </td></tr></table> |  |   | - |  |  |   |  | - |  |  |   |  | - |   |  |  |  | - |   |  |  |   | - |  |  |  |  | - |  |  |
|                                                                                                                                           |                                                                                          | -                                                                                                                                                                                                     |                                                                                                                                                                                                                                                                                                                                                                                                                                                                                                                                                                                                              |  |   |   |  |  |   |  |   |  |  |   |  |   |   |  |  |  |   |   |  |  |   |   |  |  |  |  |   |  |  |
|                                                                                                                                           |                                                                                          | -                                                                                                                                                                                                     |                                                                                                                                                                                                                                                                                                                                                                                                                                                                                                                                                                                                              |  |   |   |  |  |   |  |   |  |  |   |  |   |   |  |  |  |   |   |  |  |   |   |  |  |  |  |   |  |  |
|                                                                                                                                           |                                                                                          | -                                                                                                                                                                                                     |                                                                                                                                                                                                                                                                                                                                                                                                                                                                                                                                                                                                              |  |   |   |  |  |   |  |   |  |  |   |  |   |   |  |  |  |   |   |  |  |   |   |  |  |  |  |   |  |  |
|                                                                                                                                           |                                                                                          | -                                                                                                                                                                                                     |                                                                                                                                                                                                                                                                                                                                                                                                                                                                                                                                                                                                              |  |   |   |  |  |   |  |   |  |  |   |  |   |   |  |  |  |   |   |  |  |   |   |  |  |  |  |   |  |  |
|                                                                                                                                           |                                                                                          | -                                                                                                                                                                                                     |                                                                                                                                                                                                                                                                                                                                                                                                                                                                                                                                                                                                              |  |   |   |  |  |   |  |   |  |  |   |  |   |   |  |  |  |   |   |  |  |   |   |  |  |  |  |   |  |  |
|                                                                                                                                           |                                                                                          | -                                                                                                                                                                                                     |                                                                                                                                                                                                                                                                                                                                                                                                                                                                                                                                                                                                              |  |   |   |  |  |   |  |   |  |  |   |  |   |   |  |  |  |   |   |  |  |   |   |  |  |  |  |   |  |  |
| 8.4                                                                                                                                       | How long did the mother have cramps (adequate and consistent) until delivering the baby? | _____minute<br>77. NA<br>88. Unknown/No information                                                                                                                                                   | <table border="1" style="display: inline-table;"><tr><td> </td><td> </td><td> </td><td> </td><td> </td></tr></table>                                                                                                                                                                                                                                                                                                                                                                                                                                                                                         |  |   |   |  |  |   |  |   |  |  |   |  |   |   |  |  |  |   |   |  |  |   |   |  |  |  |  |   |  |  |
|                                                                                                                                           |                                                                                          |                                                                                                                                                                                                       |                                                                                                                                                                                                                                                                                                                                                                                                                                                                                                                                                                                                              |  |   |   |  |  |   |  |   |  |  |   |  |   |   |  |  |  |   |   |  |  |   |   |  |  |  |  |   |  |  |
| 8.5                                                                                                                                       | During labour, which part of the baby came out first?                                    | 1. Head<br>2. Leg<br>3. Breech<br>4. Arm<br>8. Unknown                                                                                                                                                | Fill in the boxes for each baby<br>Baby1 <table border="1" style="display: inline-table;"><tr><td> </td></tr></table><br>Baby2 <table border="1" style="display: inline-table;"><tr><td> </td></tr></table><br>Baby3 <table border="1" style="display: inline-table;"><tr><td> </td></tr></table>                                                                                                                                                                                                                                                                                                            |  |   |   |  |  |   |  |   |  |  |   |  |   |   |  |  |  |   |   |  |  |   |   |  |  |  |  |   |  |  |
|                                                                                                                                           |                                                                                          |                                                                                                                                                                                                       |                                                                                                                                                                                                                                                                                                                                                                                                                                                                                                                                                                                                              |  |   |   |  |  |   |  |   |  |  |   |  |   |   |  |  |  |   |   |  |  |   |   |  |  |  |  |   |  |  |
|                                                                                                                                           |                                                                                          |                                                                                                                                                                                                       |                                                                                                                                                                                                                                                                                                                                                                                                                                                                                                                                                                                                              |  |   |   |  |  |   |  |   |  |  |   |  |   |   |  |  |  |   |   |  |  |   |   |  |  |  |  |   |  |  |
|                                                                                                                                           |                                                                                          |                                                                                                                                                                                                       |                                                                                                                                                                                                                                                                                                                                                                                                                                                                                                                                                                                                              |  |   |   |  |  |   |  |   |  |  |   |  |   |   |  |  |  |   |   |  |  |   |   |  |  |  |  |   |  |  |
| 8.6                                                                                                                                       | Mode of delivery                                                                         | 1. Spontaneous/Normal<br>2. Vacuum /forcep extraction<br>3. Breech manouver<br>4. External version<br>5. Embryotomy/decapitation/evisceration<br>6. C-section/per abdominam                           | Fill in the box for each baby<br>Baby1 <table border="1" style="display: inline-table;"><tr><td> </td></tr></table><br>Baby2 <table border="1" style="display: inline-table;"><tr><td> </td></tr></table><br>Baby3 <table border="1" style="display: inline-table;"><tr><td> </td></tr></table>                                                                                                                                                                                                                                                                                                              |  |   |   |  |  |   |  |   |  |  |   |  |   |   |  |  |  |   |   |  |  |   |   |  |  |  |  |   |  |  |
|                                                                                                                                           |                                                                                          |                                                                                                                                                                                                       |                                                                                                                                                                                                                                                                                                                                                                                                                                                                                                                                                                                                              |  |   |   |  |  |   |  |   |  |  |   |  |   |   |  |  |  |   |   |  |  |   |   |  |  |  |  |   |  |  |
|                                                                                                                                           |                                                                                          |                                                                                                                                                                                                       |                                                                                                                                                                                                                                                                                                                                                                                                                                                                                                                                                                                                              |  |   |   |  |  |   |  |   |  |  |   |  |   |   |  |  |  |   |   |  |  |   |   |  |  |  |  |   |  |  |
|                                                                                                                                           |                                                                                          |                                                                                                                                                                                                       |                                                                                                                                                                                                                                                                                                                                                                                                                                                                                                                                                                                                              |  |   |   |  |  |   |  |   |  |  |   |  |   |   |  |  |  |   |   |  |  |   |   |  |  |  |  |   |  |  |
| 8.7                                                                                                                                       | Place of delivery                                                                        | 01. Own home/ family's home<br>02. TBA's home<br>03. Birthing hut (Polindes)<br>04. Auxiliary PHC (Pustu)<br>05. Rumah bidan<br>06. Hospital<br>07. On the way to health facility<br>08. Other: _____ | Fill in the box for each baby<br>Baby1 <table border="1" style="display: inline-table;"><tr><td> </td></tr></table><br>Baby2 <table border="1" style="display: inline-table;"><tr><td> </td></tr></table><br>Baby3 <table border="1" style="display: inline-table;"><tr><td> </td></tr></table>                                                                                                                                                                                                                                                                                                              |  |   |   |  |  |   |  |   |  |  |   |  |   |   |  |  |  |   |   |  |  |   |   |  |  |  |  |   |  |  |
|                                                                                                                                           |                                                                                          |                                                                                                                                                                                                       |                                                                                                                                                                                                                                                                                                                                                                                                                                                                                                                                                                                                              |  |   |   |  |  |   |  |   |  |  |   |  |   |   |  |  |  |   |   |  |  |   |   |  |  |  |  |   |  |  |
|                                                                                                                                           |                                                                                          |                                                                                                                                                                                                       |                                                                                                                                                                                                                                                                                                                                                                                                                                                                                                                                                                                                              |  |   |   |  |  |   |  |   |  |  |   |  |   |   |  |  |  |   |   |  |  |   |   |  |  |  |  |   |  |  |
|                                                                                                                                           |                                                                                          |                                                                                                                                                                                                       |                                                                                                                                                                                                                                                                                                                                                                                                                                                                                                                                                                                                              |  |   |   |  |  |   |  |   |  |  |   |  |   |   |  |  |  |   |   |  |  |   |   |  |  |  |  |   |  |  |
| 8.8                                                                                                                                       | Birth attendant                                                                          | 01. TBA                                                                                                                                                                                               | Fill in the box for each baby                                                                                                                                                                                                                                                                                                                                                                                                                                                                                                                                                                                |  |   |   |  |  |   |  |   |  |  |   |  |   |   |  |  |  |   |   |  |  |   |   |  |  |  |  |   |  |  |

|      |                                                                          |                                                                                                                                                                                                                                                                                                                                |                                                                                                              |
|------|--------------------------------------------------------------------------|--------------------------------------------------------------------------------------------------------------------------------------------------------------------------------------------------------------------------------------------------------------------------------------------------------------------------------|--------------------------------------------------------------------------------------------------------------|
|      |                                                                          | 02. Family / relative<br>03. Midwife – public (bidan-di-desa)<br>04. Midwife – private (non bidan-di-desa)<br>05. Midwife - unspecified<br>06. General practitioner – public<br>07. General practitioner - private<br>08. Obstetrician – public<br>09. Obstetrician – private<br>10. Other, specify _____<br>77. Tujuh percent | Baby1 <input type="checkbox"/><br>Baby2 <input type="checkbox"/><br>Baby3 <input type="checkbox"/>           |
| 8.9  | If the mother died, how long did the mother have cramps before she died? | _____minute<br>7777. NA (not in labour yet or mother died before delivery)<br>8888. Unknown/No information                                                                                                                                                                                                                     | <input type="checkbox"/> <input type="checkbox"/> <input type="checkbox"/> <input type="checkbox"/>          |
| 8.10 | Was there any massive bleeding during delivery?                          | 1. Yes      2. No<br>7. NA      8. Unknown                                                                                                                                                                                                                                                                                     | <input type="checkbox"/>                                                                                     |
| 8.11 | If yes, when                                                             | 1. Yes    2. No    7. NA    8. Unknown<br><br>a. Before labor<br>b. During labor<br>c. After delivery<br>d. Abortion                                                                                                                                                                                                           | <input type="checkbox"/><br><input type="checkbox"/><br><input type="checkbox"/><br><input type="checkbox"/> |
| 8.12 | Was the placenta delivered?                                              | 1. Yes      2. No<br>7. NA      8. Unknown                                                                                                                                                                                                                                                                                     | <input type="checkbox"/>                                                                                     |

**IX. HISTORY OF ANY CHRONIC AND INFECTIOUS DISEASE (should be extracted from MR)**

|     |                                       |        |       |          |                          |
|-----|---------------------------------------|--------|-------|----------|--------------------------|
| 9.1 | Bronchiale asthma                     | 1. Yes | 2. No | 8. Dknow | <input type="checkbox"/> |
| 9.2 | Epilepsy                              | 1. Yes | 2. No | 8. Dknow | <input type="checkbox"/> |
| 9.3 | Chronic Hypertension before pregnancy | 1. Yes | 2. No | 8. Dknow | <input type="checkbox"/> |
| 9.4 | Heart disease                         | 1. Yes | 2. No | 8. Dknow | <input type="checkbox"/> |
| 9.5 | Diabetes before pregnancy             | 1. Yes | 2. No | 8. Dknow | <input type="checkbox"/> |
| 9.6 | Chronic kidney disease                | 1. Yes | 2. No | 8. Dknow | <input type="checkbox"/> |
| 9.7 | Malaria                               | 1. Yes | 2. No | 8. Dknow | <input type="checkbox"/> |
| 9.8 | Tuberculosis                          | 1. Yes | 2. No | 8. Dknow | <input type="checkbox"/> |
| 9.9 | Other, specify .....                  | 1. Yes | 2. No | 8. Dknow | <input type="checkbox"/> |

| No.                       | Questions                                                                              | Response Categories                                                                                                                                                                                                                       | Code                                                                                                                                                                                                                                                     |
|---------------------------|----------------------------------------------------------------------------------------|-------------------------------------------------------------------------------------------------------------------------------------------------------------------------------------------------------------------------------------------|----------------------------------------------------------------------------------------------------------------------------------------------------------------------------------------------------------------------------------------------------------|
| <b>X. ECONOMIC STATUS</b> |                                                                                        |                                                                                                                                                                                                                                           |                                                                                                                                                                                                                                                          |
| 10.1                      | House ownership                                                                        | 1. Own house<br>2. Family's house<br>3. Rent<br>4. Official house<br>5. Other, specify .....                                                                                                                                              | <input type="checkbox"/>                                                                                                                                                                                                                                 |
| 10.2                      | Do you or does your household have any of the following?<br><br>READ OUT THE RESPONSES | <p style="text-align: center; color: red;">1=Yes      2=No      8=Don't know</p> A. Electricity<br>B. Radio/transistor<br>C. Television<br>D. Telephone/handphone<br>E. Refrigerator<br>F. Bicycle<br>G. Motorcycle<br>H. Car<br>I. Truck | <input type="checkbox"/><br><input type="checkbox"/><br><input type="checkbox"/><br><input type="checkbox"/><br><input type="checkbox"/><br><input type="checkbox"/><br><input type="checkbox"/><br><input type="checkbox"/><br><input type="checkbox"/> |

|      |                                                                               |                                                                                                                                                                                                               |                                                                                                                                                                      |
|------|-------------------------------------------------------------------------------|---------------------------------------------------------------------------------------------------------------------------------------------------------------------------------------------------------------|----------------------------------------------------------------------------------------------------------------------------------------------------------------------|
| 10.3 | Floor                                                                         | 1. Natural floor (earth/sand/mud)<br>2. Wood<br>3. Bamboo<br>4. Brick/concrete/cement<br>5. Ceramic<br>6. Tile<br>7. Other, specify, _____<br>8. Don't know                                                   | <input type="checkbox"/>                                                                                                                                             |
| 10.4 | Wall                                                                          | 1. Bamboo<br>2. Wood<br>3. Brick/concrete<br>4. Semi-permanent<br>5. Other, specify, _____<br>8. Don't know                                                                                                   | <input type="checkbox"/>                                                                                                                                             |
| 10.5 | Are you a member of any of the following health insurance / benefit programs? | 1. Yes    2. No    8. Don't know<br>1. Out-of-pocket payment<br>2. Private insurance<br>3. Askes PNS/paid by company/Jamsostek<br>4. Askes Gakin/Jamkesmas/Askeskin/Jamkesda/ SKTM<br>5. Other, specify _____ | <input type="checkbox"/><br><input type="checkbox"/><br><input type="checkbox"/><br><input type="checkbox"/><br><input type="checkbox"/><br><input type="checkbox"/> |

| No.                     | Questions                                                                         | Response Categories                                                                                                                                                                                           | Code                                                                                                                                                                                                    |
|-------------------------|-----------------------------------------------------------------------------------|---------------------------------------------------------------------------------------------------------------------------------------------------------------------------------------------------------------|---------------------------------------------------------------------------------------------------------------------------------------------------------------------------------------------------------|
| <b>XI. COST OF CARE</b> |                                                                                   |                                                                                                                                                                                                               |                                                                                                                                                                                                         |
| 11.1                    | How much is the total cost spent by the family for [NAME]'s care in this hospital | <b>Total cost of care, includes for buying medicines from outside the hospital; excluded cost for the family's transportation and accommodation.</b>                                                          | <input type="checkbox"/> |
| 11.2                    | Method of payment and share of total cost for this care                           | 1. Yes    2. No    8. Don't know<br>1. Out-of-pocket payment<br>2. Private insurance<br>3. Askes PNS/paid by company/Jamsostek<br>4. Askes Gakin/Jamkesmas/Askeskin/Jamkesda/ SKTM<br>5. Other, specify _____ | <input type="checkbox"/><br><input type="checkbox"/><br><input type="checkbox"/><br><input type="checkbox"/><br><input type="checkbox"/><br><input type="checkbox"/>                                    |

CHECK THE COMPLETENESS OF QUESTIONNAIRE.

IF ALL HAS BEEN COMPLETED, WRITE DOWN TIME OF THE INTERVIEW END AND THANK THE RESPONDENT.
